# Supplementary material for: Global Impact of COVID-19 Pandemic on Physical Activity Habits of Competitive Runners: an Analysis of Wearable Device Data
Source: Preprints.org preprint supplement (doi:10.20944/preprints202209.0068.v1), 2022-09-05

## Supplementary File 1

**Table S1.** Percent increase in activity counts by country from 2019 to 2020 compared for 67-day periods before and after the WHO pandemic date of March 11. Values correspond to **Figure 2**.

| Country        | % Increase Pre-March 11 | % Increase Post-March 11 | Difference |
|----------------|-------------------------|--------------------------|------------|
| Spain          | 1.44                    | -42.39                   | -43.83     |
| Italy          | 5.68                    | -19.37                   | -25.05     |
| Brazil         | -0.77                   | -15.18                   | -14.41     |
| France         | 2.68                    | -2.30                    | -4.98      |
| Belgium        | 11.15                   | 8.37                     | -2.78      |
| Austria        | 22.31                   | 20.869                   | -1.41      |
| Canada         | -2.42                   | -1.47                    | 0.95       |
| Australia      | -2.17                   | -0.30                    | 1.87       |
| Japan          | -2.67                   | -0.50                    | 2.17       |
| Germany        | 2.80                    | 6.84                     | 4.05       |
| United States  | -2.07                   | 3.72                     | 5.79       |
| United Kingdom | -2.16                   | 5.35                     | 7.51       |
| Netherlands    | 3.81                    | 17.05                    | 13.24      |
| Switzerland    | -4.06                   | 18.22                    | 22.28      |

**Figure S1.** COVID-19 Government Response Stringency Index (GRSI) and daily activity counts per number of users for 14 countries in 2019 and 2020.

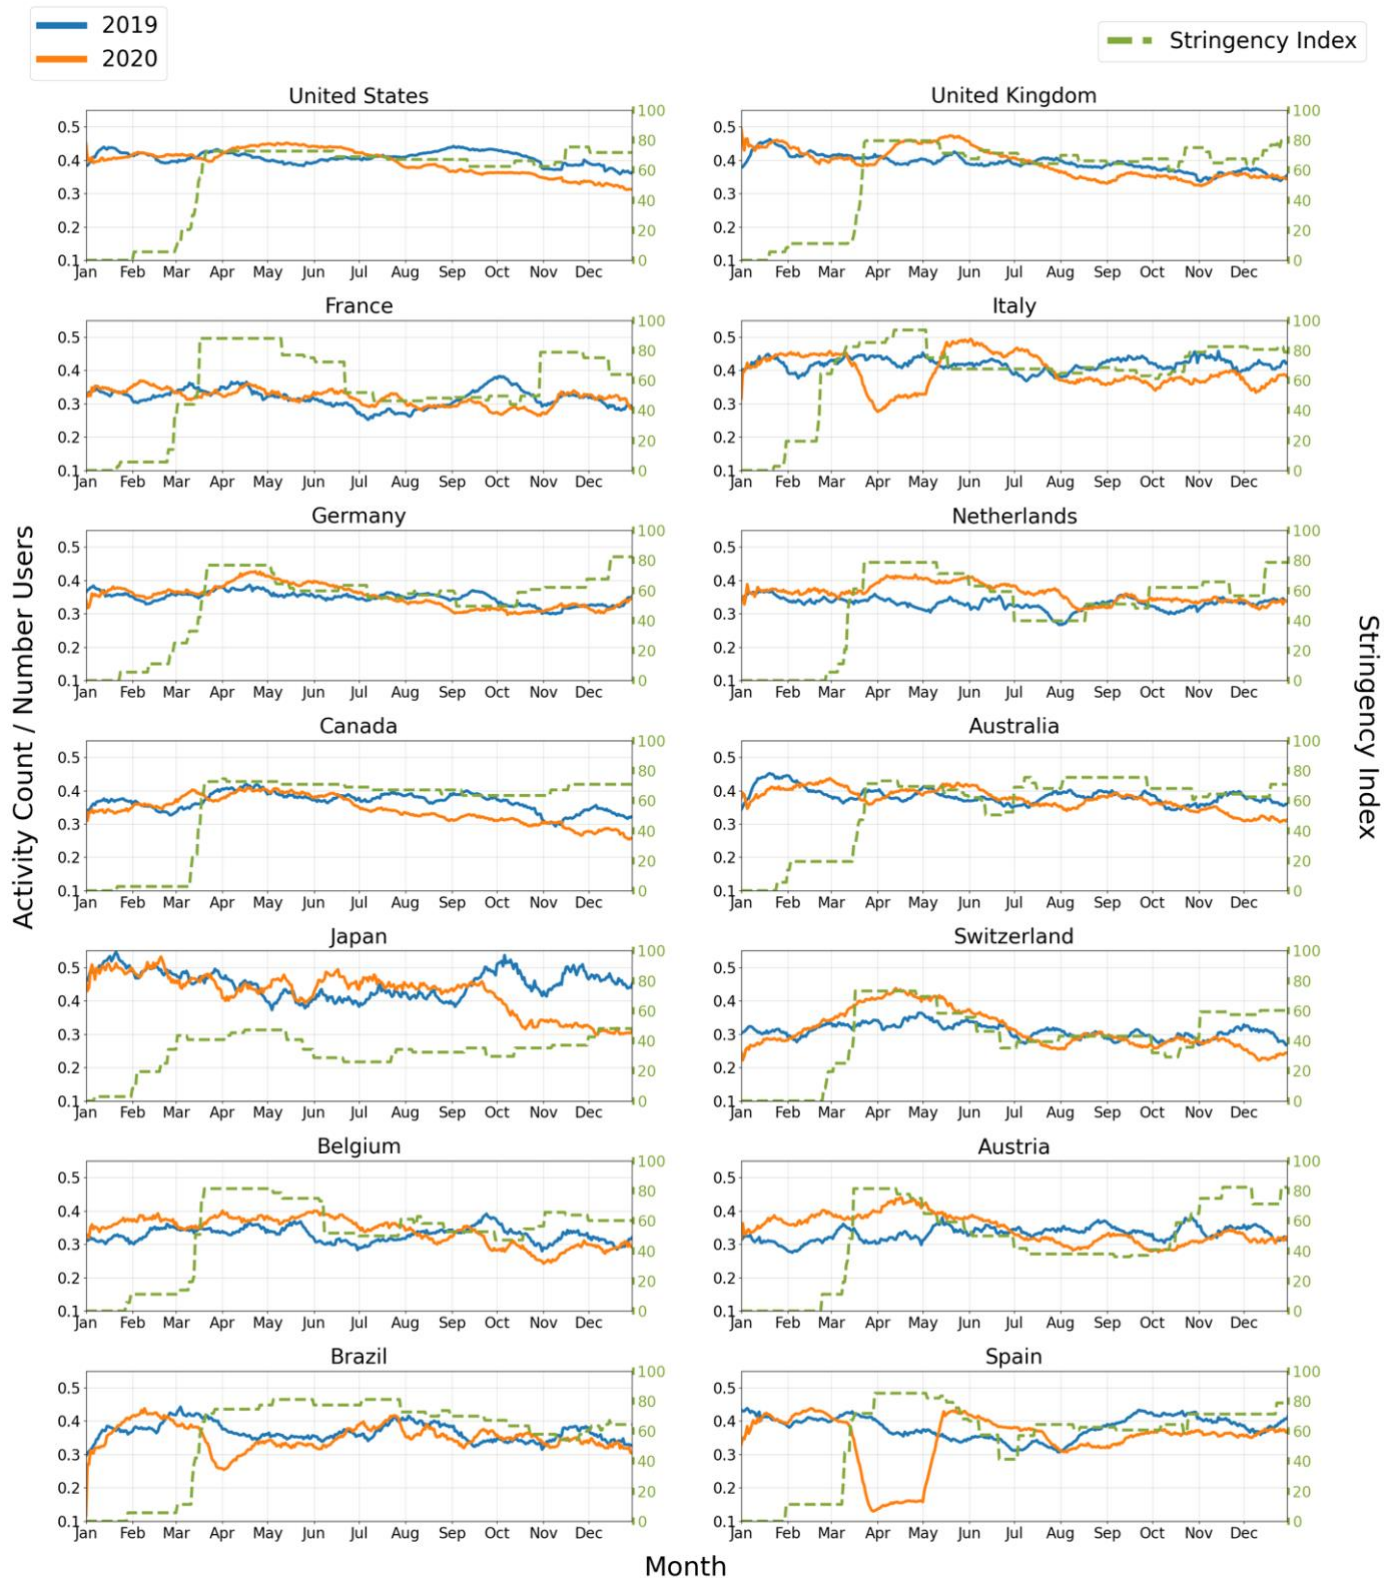

**Figure S2.** Normalized activity counts for the time periods before work (12 AM to 8 AM), during working hours (8 AM to 5 PM), and after work (5 PM to 12 AM). Significance with  $p < 0.05$  is denoted by \*, \*\* denotes  $p < 0.01$ , \*\*\* denotes  $p < 0.001$ , \*\*\*\* denotes  $p < 0.0001$  for 14 countries in 2019 and 2020.

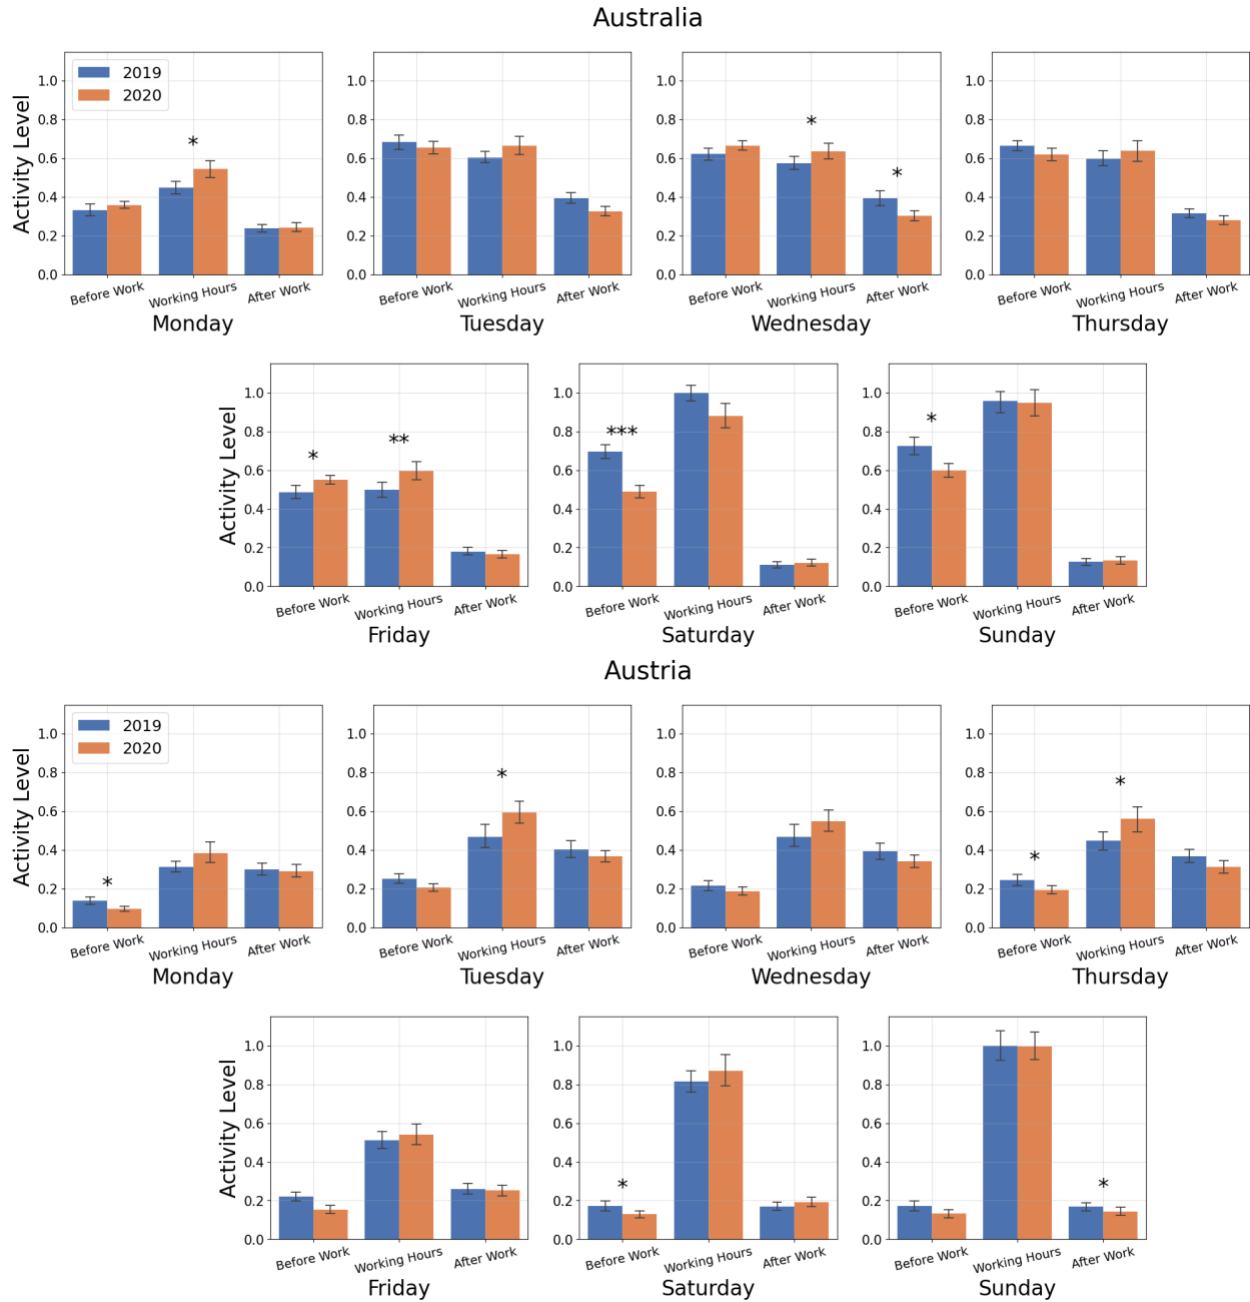

## Belgium

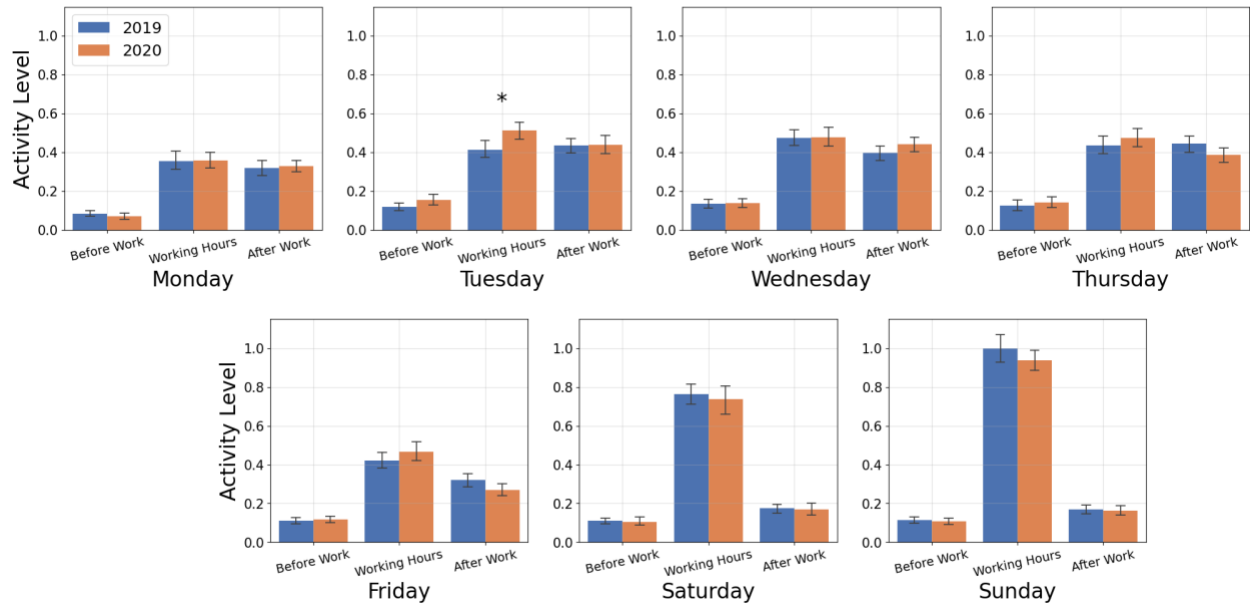

## Brazil

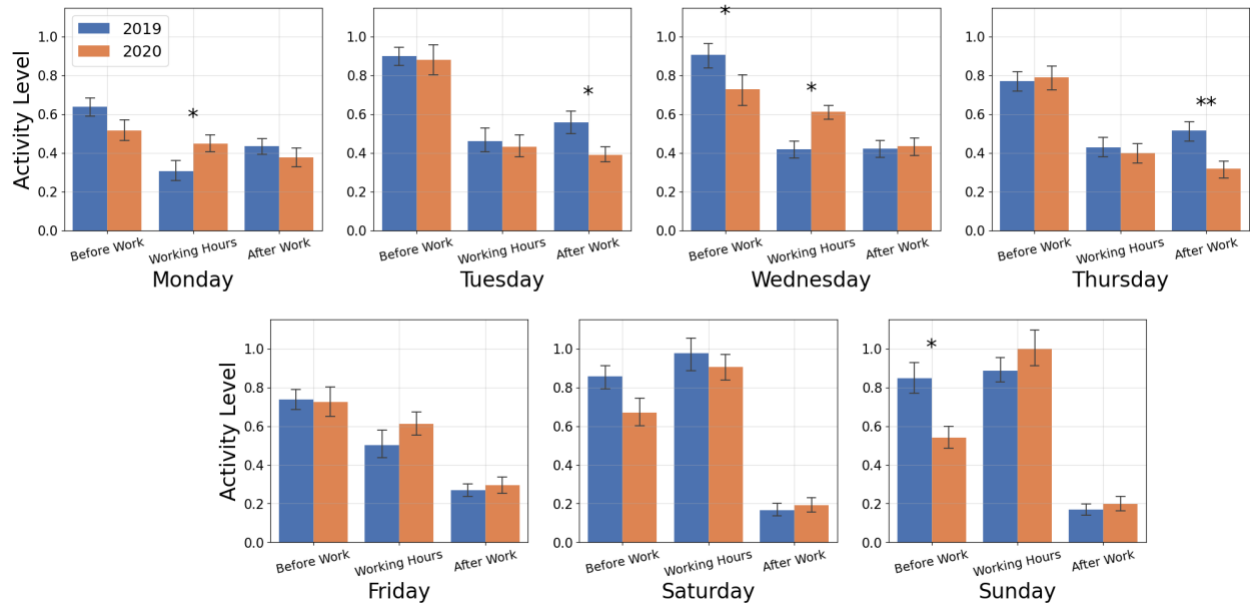

## Canada

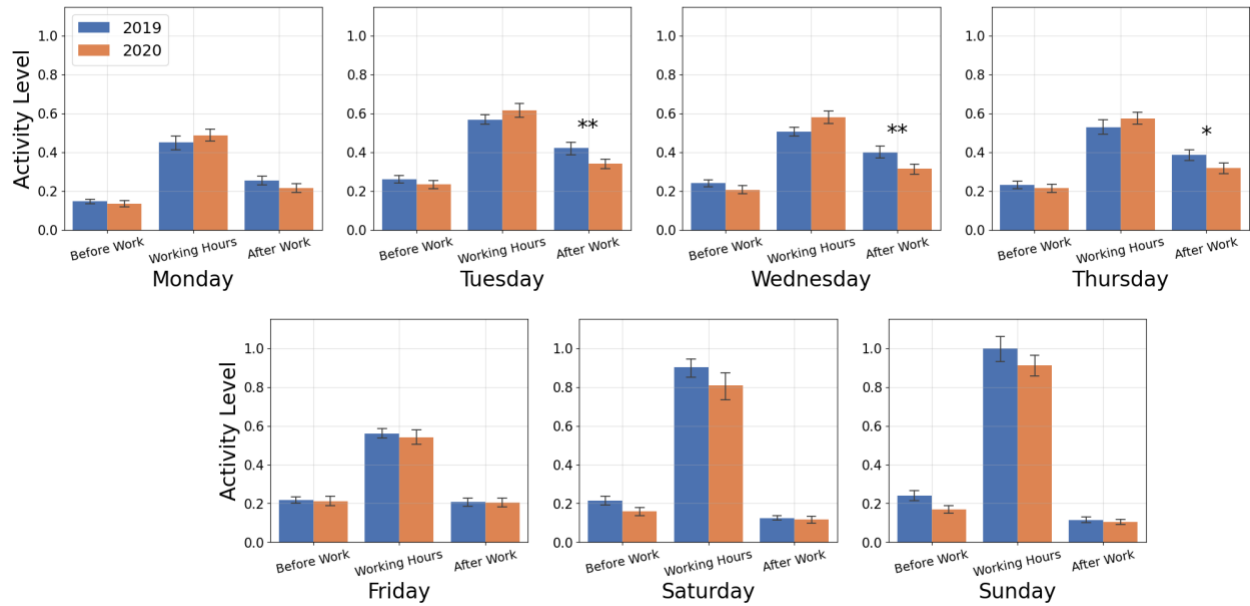

## France

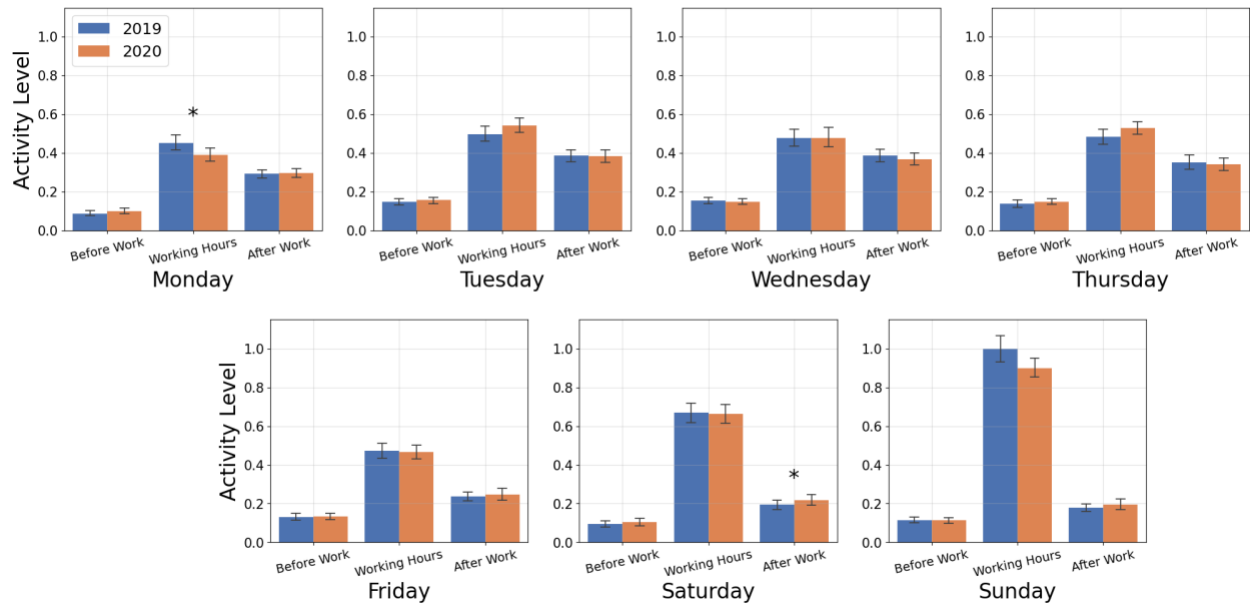

## Germany

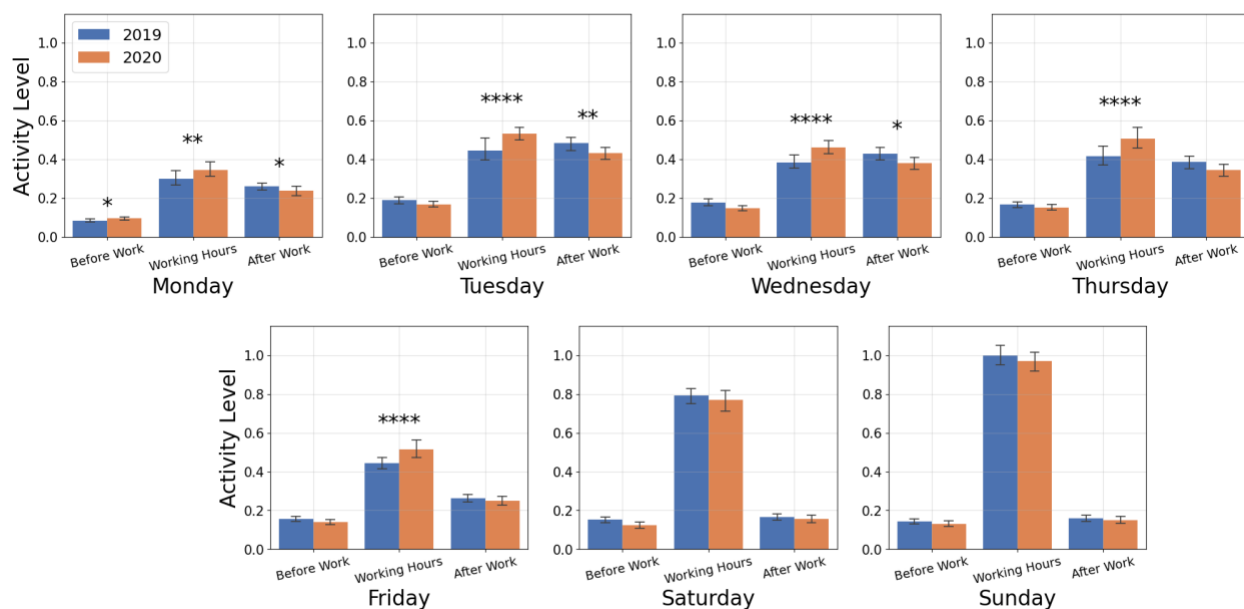

## Italy

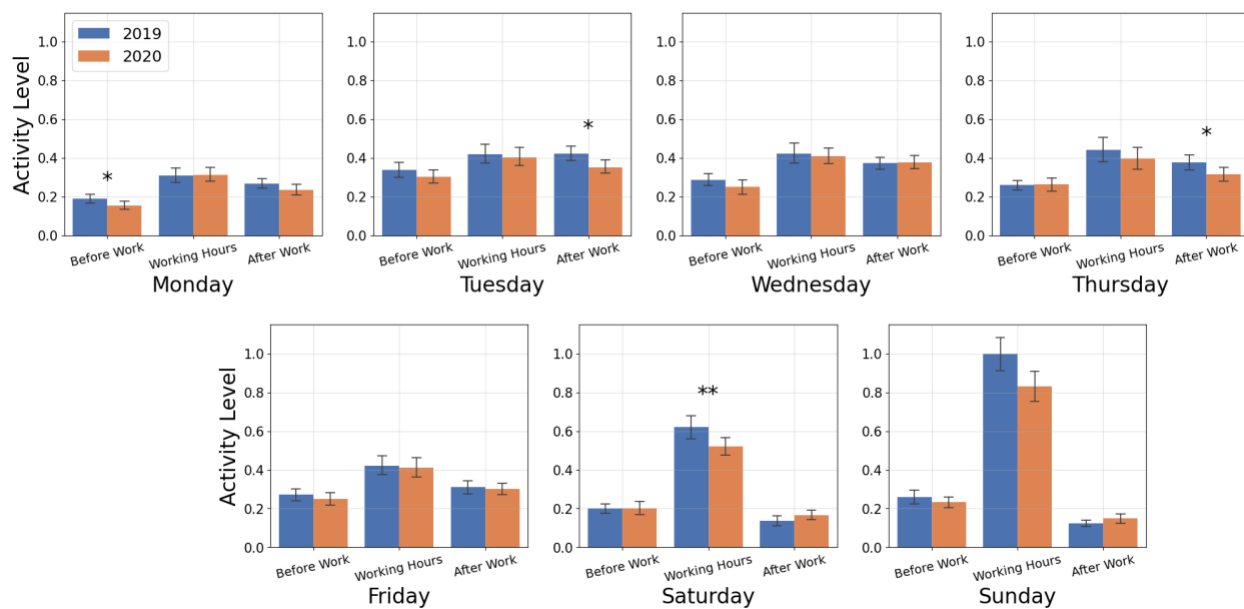

## Japan

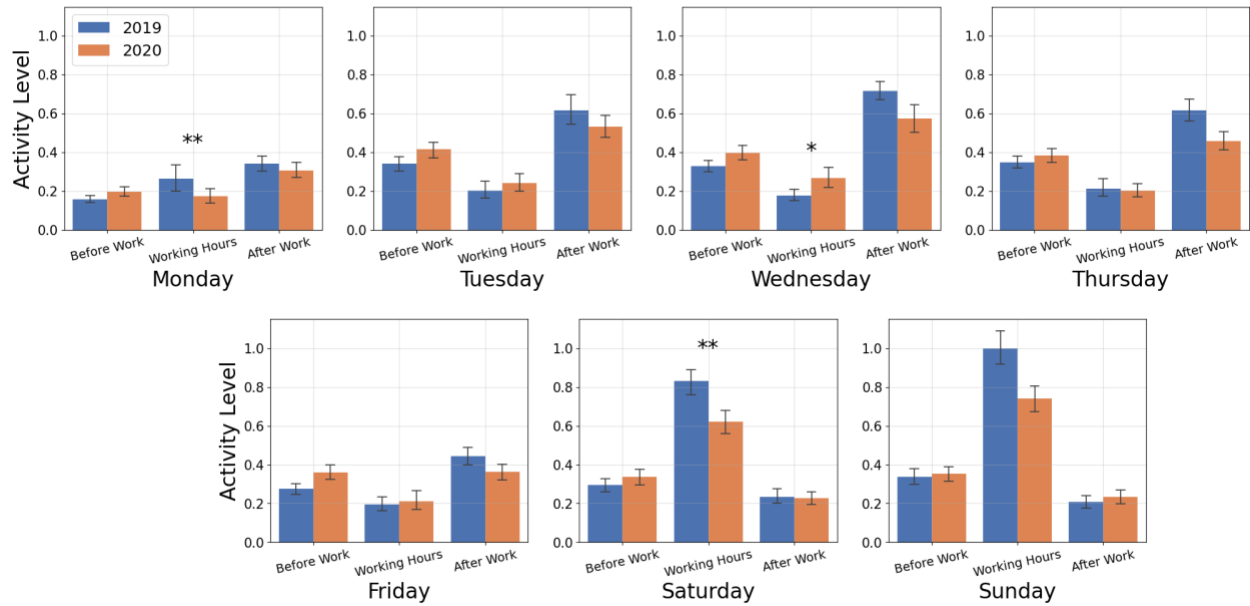

## Netherlands

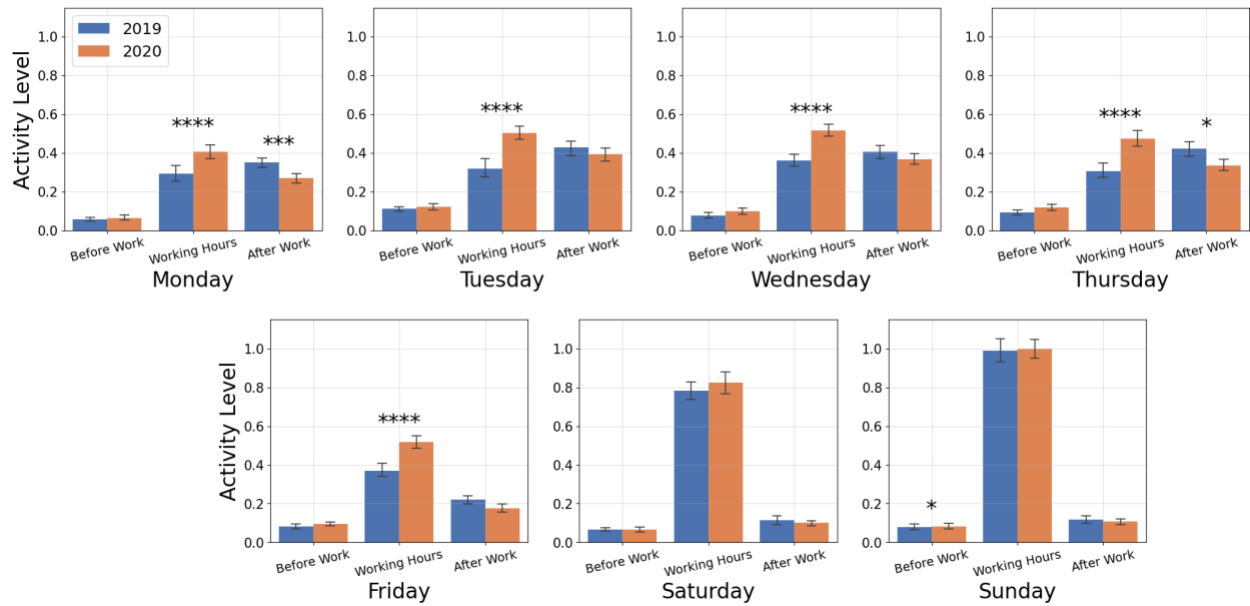

## Spain

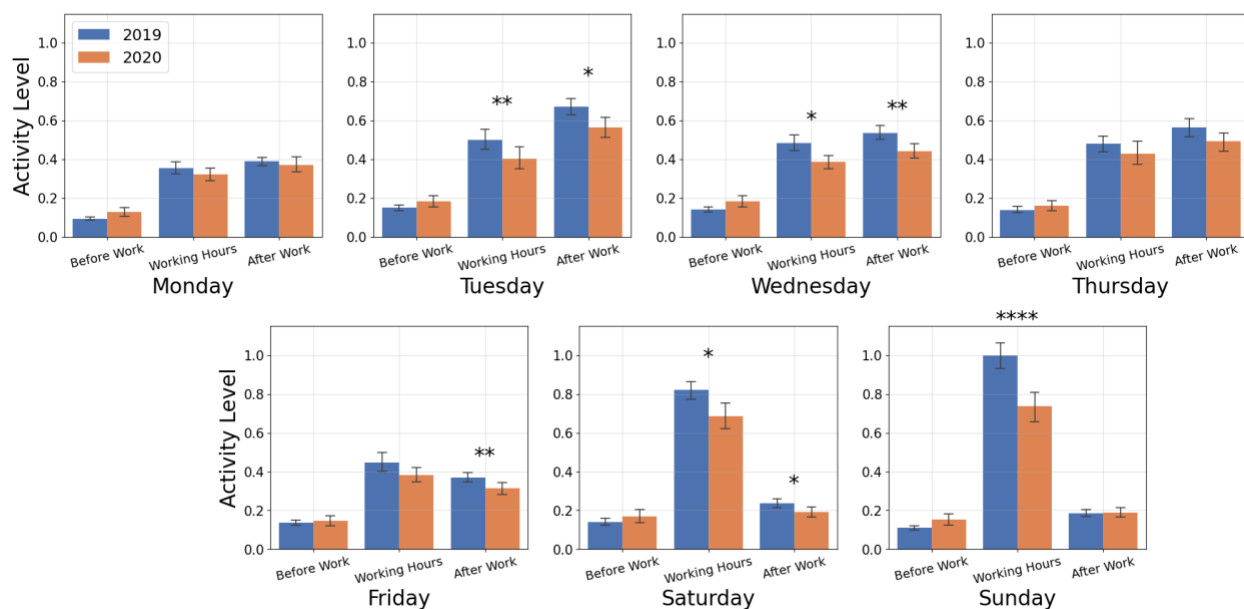

## Switzerland

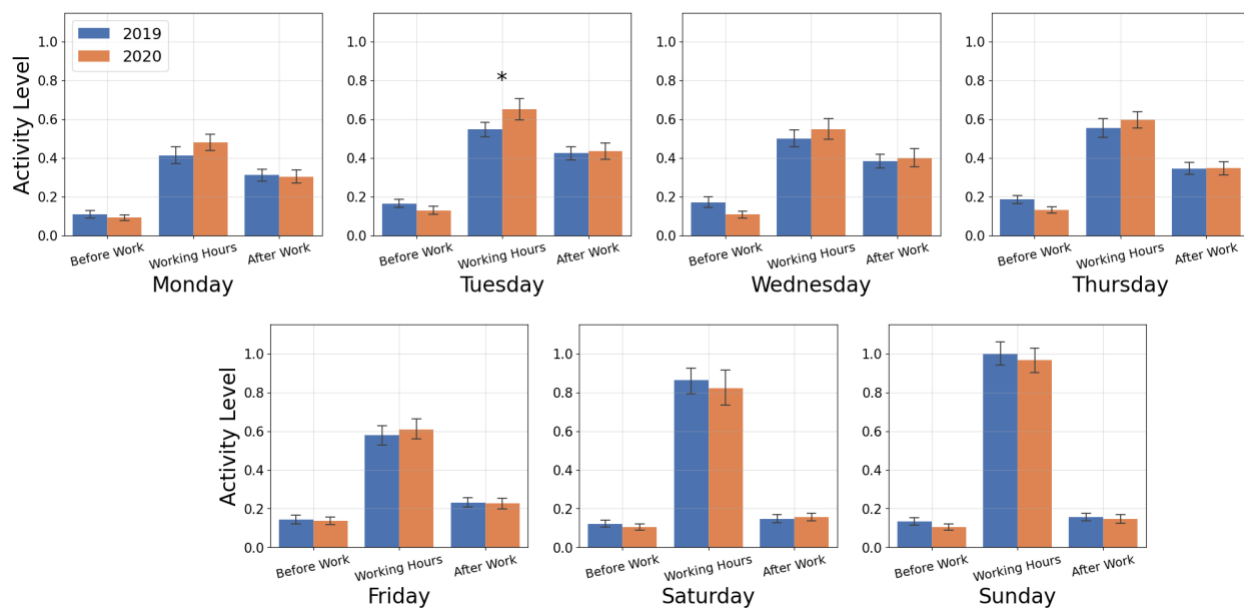



## United Kingdom

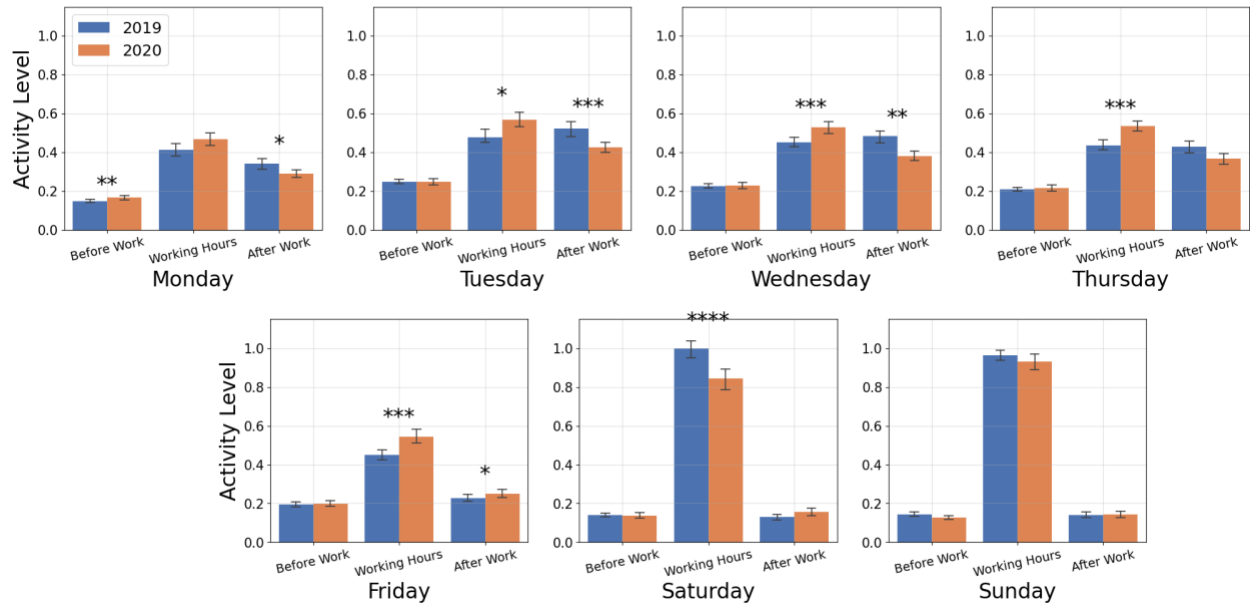

## United States

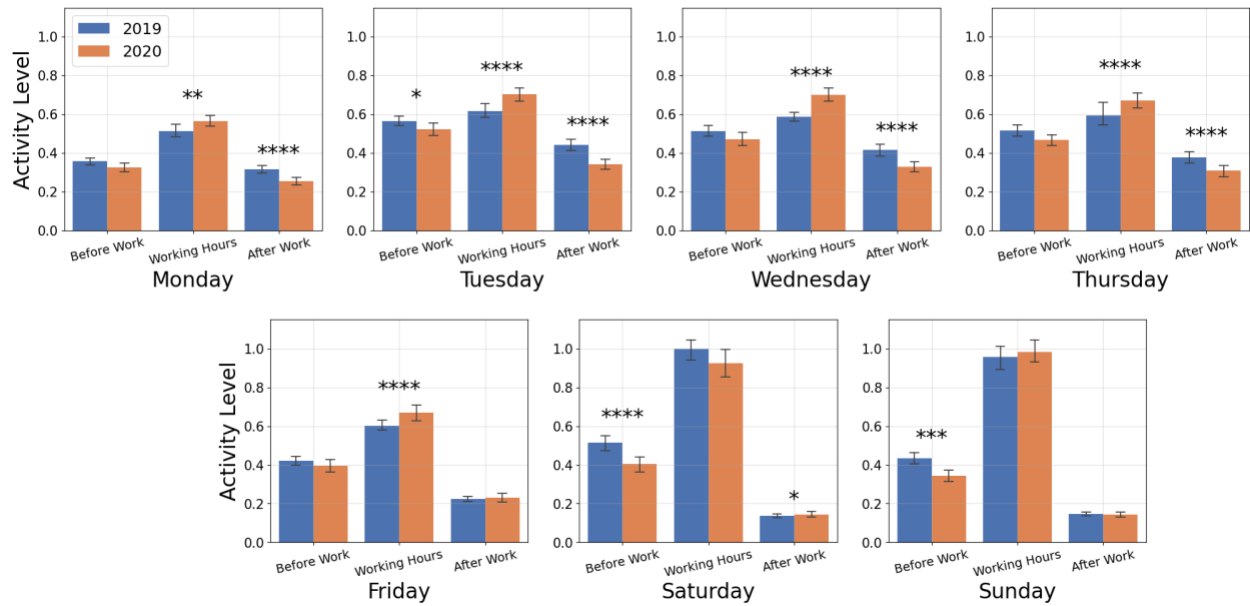

Supplement: Supplementary file 1 [file supplementary]
